# Supplementary material for: Identification of potential genetic causal variants for rheumatoid arthritis by whole-exome sequencing
Source: PubMed Central journal article supplement (PMC5762310; doi:10.18632/oncotarget.22630), 2017-11-22
Supplement: oncotarget-08-111119-s001.pdf [file oncotarget-08-111119-s001.pdf]

# Identification of potential genetic causal variants for rheumatoid arthritis by whole-exome sequencing

## SUPPLEMENTARY MATERIALS

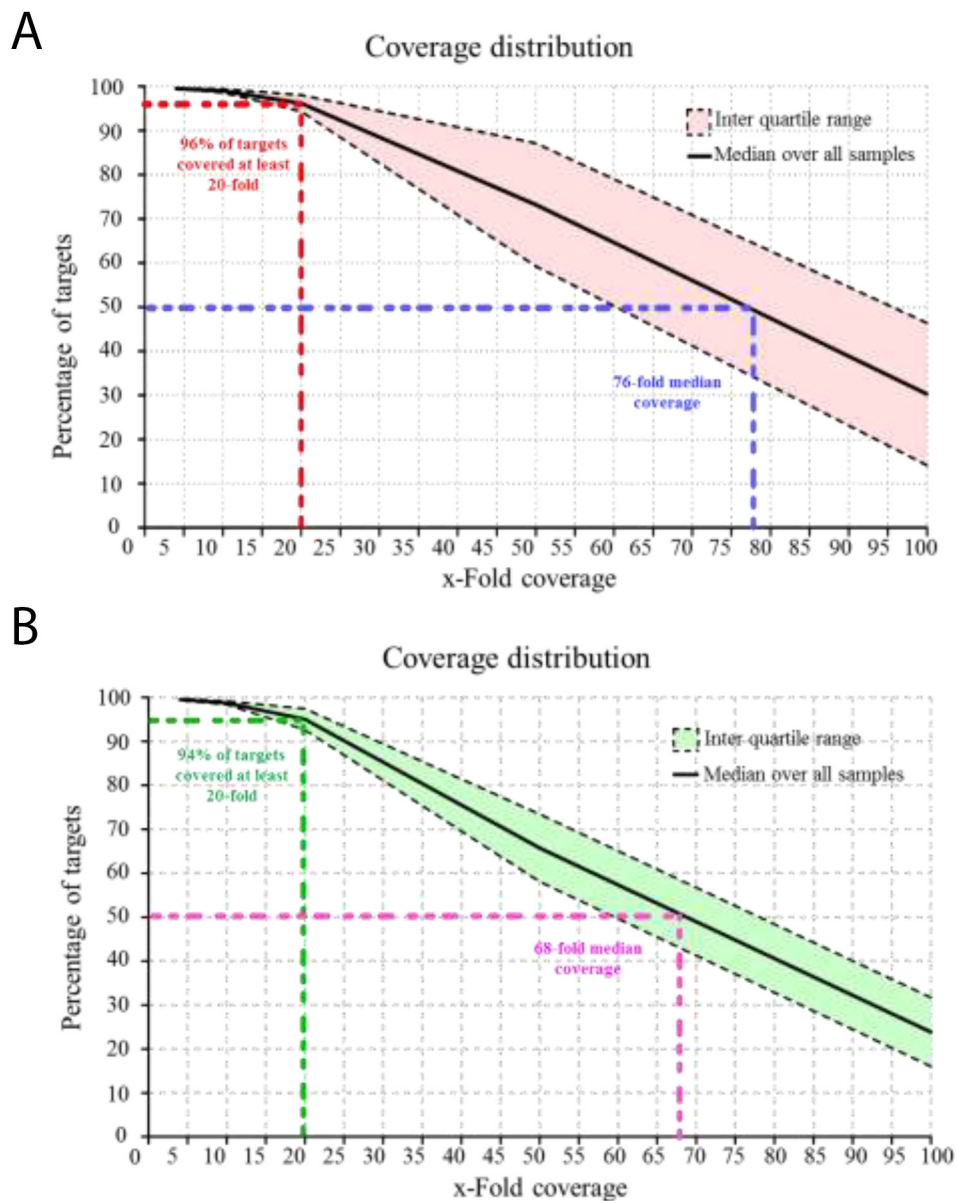

**Supplementary Figure 1: Coverage distribution for all exons targeted by enrichment was evaluated by inter-quartile range calculation using SPSS 22.0 software. (A) The median coverage for all RA samples was 76-fold, with on average 96% of all targets covered at least 20-fold. (B) The median coverage for all healthy control samples was 68-fold, with on average 94% of all targets covered at least 20-fold.**

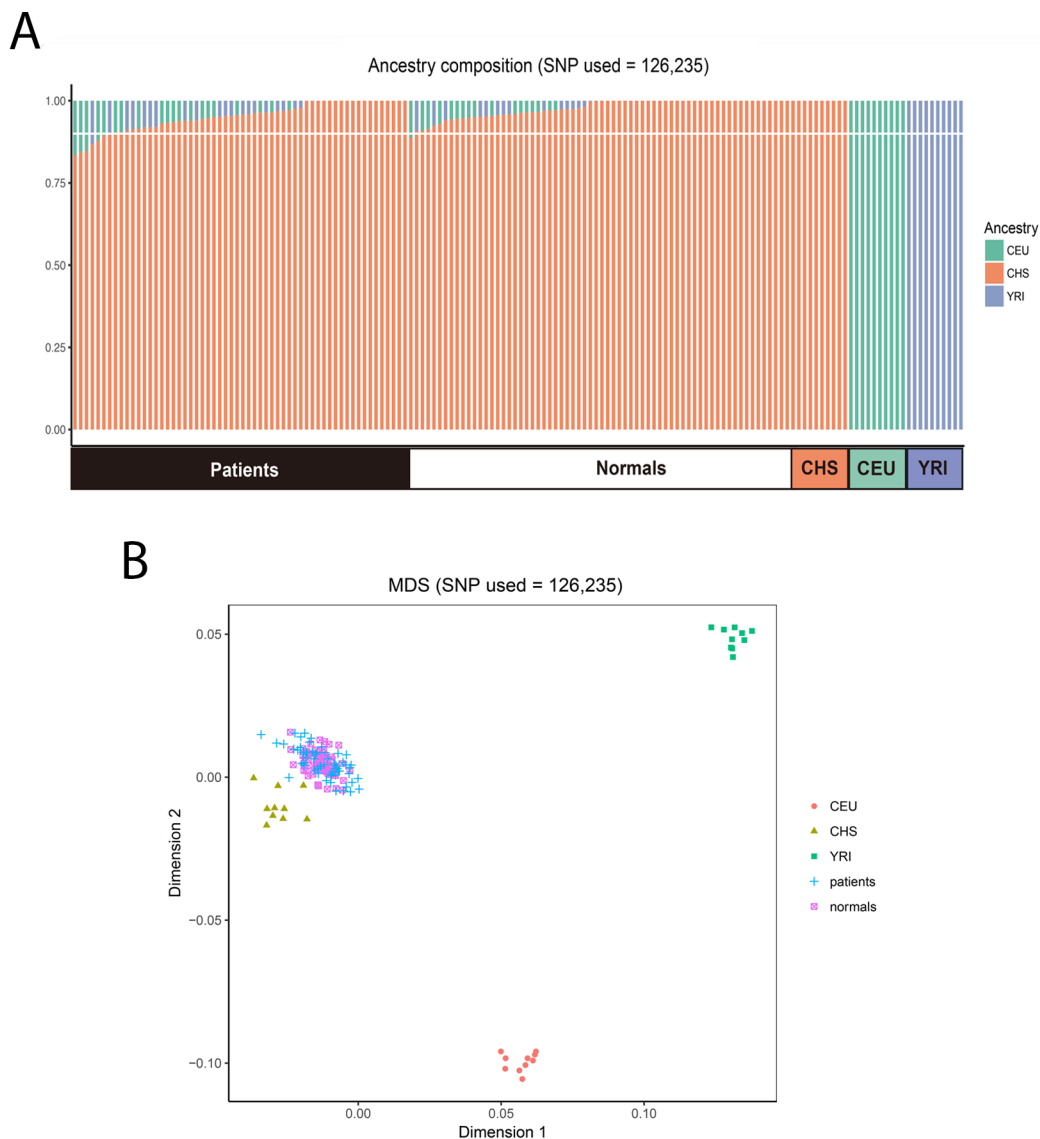

**Supplementary Figure 2: Ancestral composition of RA and healthy control samples with Hapmap reference populations.** (A) All of them had >80% Chinese ancestry (white horizontal line) by admixture analysis. (B) Dimension 1 and 2 of multidimensional scaling analysis for the RA and control samples. Patients, fifty-eight RA samples. Normals, sixty-six healthy control samples. Ten HapMap samples were randomly chosen from each of the three reference populations (CEU, CHS and YRI) and are shown in figures. CEU, Utah Residents with Northern and Western European Ancestry; CHS, Southern Han Chinese; YRI, Yoruba in Ibadan, Nigeria.

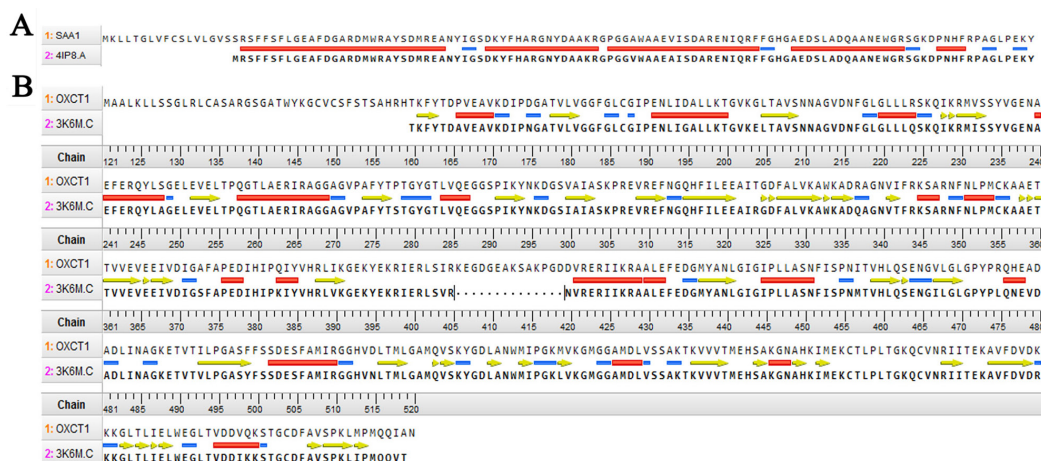

**Supplementary Figure 3:** Sequence alignment of target proteins (A) SAA1 (Protein RefSeq: NP\_000322.2) and (B) SCOT1 (Protein RefSeq: NP\_000427.1) with their template structures used in homolog modeling. Red line represents  $\alpha$  helix, yellow arrow represents  $\beta$  sheet, and blue line represents loop region.

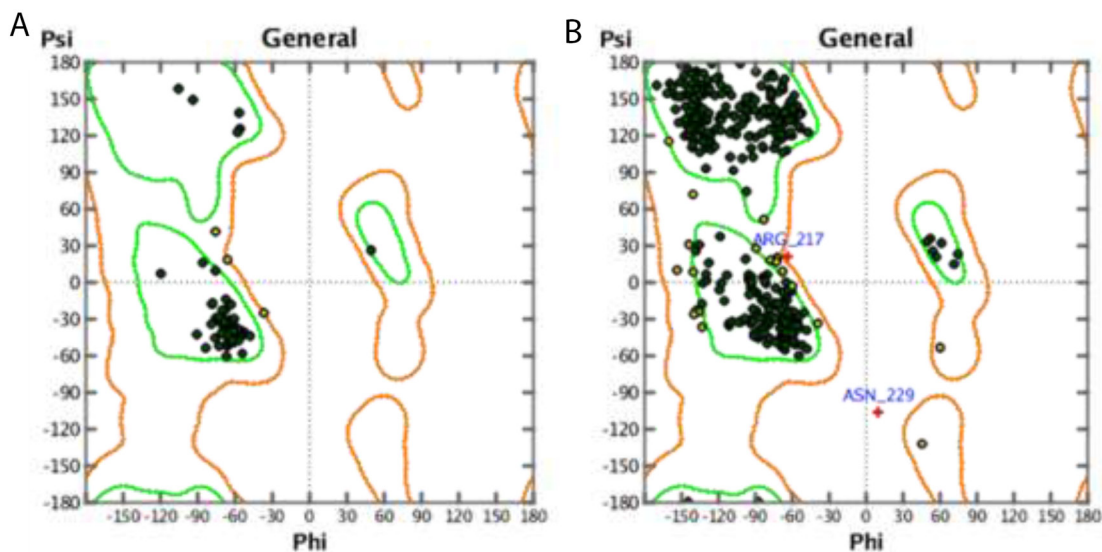

**Supplementary Figure 4:** Ramachandran plots for evaluation of protein model. (A) For SAA1, 99.03% of the residues are in the favored region and 0.97% are in the allowed region. (B) For SCOT1, 95.81% of the residues are in the favored region, 3.77% are in the allowed region and only 0.42% are in the disallowed region. Green represents favored region and light-brown represents allowed region.

**Supplementary Table 1: Types of exonic, splicing and nonsynonymous variants (total =72,024)**

| <b>Mutation type</b> | <b>No. of variants</b> |
|----------------------|------------------------|
| Nonsynonymous SNV    | 56,466                 |
| Stop-gain            | 828                    |
| Stop-loss            | 49                     |
| Frameshift           | 408                    |
| Deletion             | 215                    |
| Insertion            |                        |
| Nonframeshift        | 705                    |
| Deletion             | 466                    |
| Insertion            |                        |
| Splicing             | 11,377                 |
| Unknown              | 1510                   |

**Supplementary Table 2: Clinical conditions associated with group 2 variants in RA and control comparison.**

See Supplementary File 1

**Supplementary Table 3: Candidate variant list from RA versus control comparison.**

See Supplementary File 2

**Supplementary Table 4: Candidate variant list from RA disease duration comparison.**

See Supplementary File 3

**Supplementary Table 5: Susceptibility genes unique to disease duration with exonic variants in Rheumatoid Arthritis disease**

| <b>AMPD1</b> | <b>ATXN7</b> | <b>GPR84</b> | <b>OR7G3</b> |
|--------------|--------------|--------------|--------------|
| PPARGC1B     | C10orf142    | OR9K2        | CST9         |
| ATP6V0A4     | CH17-360D5.1 | OR6C74       | WDR33        |
| HKDC1        | NPY4R        | OR6C75       | DNAJC28      |
| C1orf167     | LRRC39       | CATSPER4     | DDTL         |
| SLCO1B3      | GPSM2        | NR2C1        | UPB1         |
| MYH1         | ITGA10       | SERPINA10    | LCLAT1       |
| SGCA         | LCE5A        | RORA         | CASR         |
| RYR1         | OR4A15       | TPSG1        | CDKN2AIP     |
| KIZ          | OR52N4       | NEK8         | FRYL         |
| TPTE         | SLAMF8       | HEATR9       | CWH43        |
| LRP2         | MTA2         | PNMT         | NMUR2        |
| DYSF         | EML3         | ABCC3        | GABRP        |
| COL6A6       | GPR161       | NACA2        | MDC1         |
| CP           | IL18BP       | CACNG5       | ENPP5        |
| HTR3E        | PANO1        | AURKB        | RAB19        |
| TET2         | LHX4         | PLEKHG2      | EPHB6        |
| THBS2        | LAD1         | PSG8         | GOT1L1       |
| FLNC         | SYT14        | CBLC         | HEMGN        |
| SSPO         | FAAP20       | CARD8        | ALG2         |
| PKHD1L1      | HIST4H4      | TARM1        | FTHL17       |
| IL3RA        | OR14C36      | PRR36        |              |

**Supplementary Table 6: High priority candidate gene list in Rheumatoid Arthritis disease.**

See Supplementary File 4

**Supplementary Table 7: Comparison of X chromosome associated novel variants distribution between female and male in RA patients.**

See Supplementary File 5
